# Supplementary material for: Systematic genetic testing for recessively inherited monogenic diabetes: a cross-sectional study in paediatric diabetes clinics
Source: PubMed Central journal article supplement (PMC8741690; doi:10.1007/s00125-021-05597-y), 2021-10-23
Supplement: 125_2021_5597_MOESM1_ESM.pdf [file 125_2021_5597_MOESM1_ESM.pdf]

## **ESM Supplemental Methods**

**Sample size:** Our study aims to determine the prevalence of monogenic diabetes in Turkish paediatric clinics. Therefore, we have used a precision-based sample size calculation to assess if we had the power to detect a similar prevalence to that found in a previous UK paediatric study [1]. The sample size based on the previous systematic study of monogenic diabetes in paediatric clinics in the UK which identified 20 patients with monogenic diabetes from total 808 children (2.5%). Based on this, to identify at least 20 patients at 2.5% prevalence at 90% power, we needed a sample size of 1034. We recruited 1093 participants. This provided 90% power to detect prevalence of monogenic diabetes of 2.5% with a 90% confidence interval of 1.6% to 3.6%.

### **Type 1 diabetes genetic risk score**

We used 30 type 1 diabetes (T1D) associated single nucleotide polymorphisms (SNPs) to generate the weighted T1D genetic risk score (T1D-GRS) as previously described [2]. The list of 30 SNPs along with weights used in the generation of risk score is provided below. SNPs were genotyped using fluorescence-based competitive-allele specific assay at LGC Genomics, Hoddesdon, UK. We were unable to generate T1D-GRS in 34 individuals in whom either genotyping results were missing for one of the alleles that have the greatest influence on the GRS (DR3/DR4-DQ8 or HLA-DRB1 15), or who were missing more than two other SNPs. Individuals with missing GRS were excluded from the final study cohort.

### **Genetic testing**

The coding regions and 50 nucleotides of flanking intronic sequence of 50 known monogenic diabetes genes were analysed by targeted-next generation sequencing (t-NGS) according to the methodology described by Ellard et al.[3] The panel includes genes known to cause neonatal diabetes, MODY, type 1 diabetes as part of an autoimmune syndrome, lipodystrophy, severe insulin resistance, other forms of syndromic diabetes and the mitochondrial mutation m.3243A>G associated with maternally inherited diabetes and deafness. The pathogenicity of variants was determined using the five-tier classification system as per the American College of Medical Genetics (ACMG) guidelines [4].

**ESM Table 1. Characteristics of the study cohort**

|                                                                                              | <b>Whole cohort, n=1093</b> |
|----------------------------------------------------------------------------------------------|-----------------------------|
| <b>Age at diagnosis (years)</b>                                                              | 8.1 (5-11.5), 1093          |
| <b>Duration at recruitment (years)</b>                                                       | 3.1 (1.2-5.6), 1093         |
| <b>Age at recruitment (years)</b>                                                            | 12.5 (9.1-15.4), 1093       |
| <b>BMI centile</b>                                                                           | 61 (33-82), 1092            |
| <b>BMI centile <math>\geq 95^{\text{th}}</math></b>                                          | 86/1092 (8)                 |
| <b>Female</b>                                                                                | 547/1093 (50)               |
| <b>Extra pancreatic features</b>                                                             |                             |
| <b>Autoimmune</b>                                                                            | 82/1093 (8)                 |
| <b>Non-Autoimmune</b>                                                                        | 68/1093 (6)                 |
| <b>Parents with diabetes</b>                                                                 | 156/1076 (15)               |
| <b>Consanguineous parents</b>                                                                | 223/1093 (20)               |
| <b>Any antibody positive</b>                                                                 | 479/730 (66)                |
| <b>Duration at antibody measured, months</b>                                                 | 0 (0-0), 682                |
| <b>C-peptide within 6 months from diagnosis (pmol/l)</b>                                     | 156 (83-283), 603           |
| <b>HbA1c at recruitment, %</b>                                                               | 8.7 (7.5-10.3), 1076        |
| <b>HbA1c at recruitment, mmol/mol</b>                                                        | 72 (58-89), 1076            |
| <b>Treatment</b>                                                                             |                             |
| <b>None</b>                                                                                  | 21/1093 (2)                 |
| <b>OHA</b>                                                                                   | 9/1093 (1)                  |
| <b>Insulin</b>                                                                               | 1044/1093 (96)              |
| <b>Insulin + OHA</b>                                                                         | 19/1093 (2)                 |
| <b>Insulin dose (units/kg/day)</b>                                                           | 0.9 (0.7-1.1), 996          |
| <b>T1D-GRS</b>                                                                               | 0.278 (0.257-0.297), 1093   |
| <b>T1D-GRS categories</b>                                                                    |                             |
| <b>T1D-GRS <math>&lt; 5^{\text{th}}</math> centile (<math>&lt; 0.234</math>)</b>             | 111/1093 (10)               |
| <b>T1D-GRS <math>5^{\text{th}}</math>-<math>25^{\text{th}}</math> centile (0.234-0.262)</b>  | 224/1093 (20)               |
| <b>T1D-GRS <math>25^{\text{th}}</math>-<math>50^{\text{th}}</math> centile (0.263-0.280)</b> | 242/1093 (22)               |
| <b>T1D-GRS <math>&gt; 50^{\text{th}}</math> centile (<math>&gt; 0.280</math>)</b>            | 516/1093 (47)               |
| <b>Composite clinical probability of MODY <math>\geq 10\%</math></b>                         | 76/915 (8)                  |

Data are median (IQR) for continuous variable or number (%) for categorical variables. Number of people where the data was available is indicated after comma for continuous variables and after forward slash for categorical variables. T1D-GRS centile were based on 1963 European gold standard T1D population from WTCCC case control consortium study. OHA, Oral hypoglycaemic agents; T1D-GRS, Type 1 diabetes – Genetic Risk Score; MODY, Maturity Onset Diabetes of the Young.

**ESM Table 2. diabetes single nucleotide polymorphisms (SNPs) and their weights included in the generation of genetic risk score.** Effect allele is the risk increasing allele on the positive strand. The rs7454108 genotypes (+ve strand) corresponding to the different DR3/DR4 genotypes are: TT/TT = DR3/DR3; TC/CT = DR3/DR4; TC/TT = DR3/X; CC/CC = DR4/DR4; CC/CT = X/DR4; CC/TT = X/X.

| SNP                     | Gene                   | Odds Ratio | Weight | Effect Allele |
|-------------------------|------------------------|------------|--------|---------------|
| rs2187668,<br>rs7454108 | <i>DR3/DR4-DQ8</i>     | 48.18      | 3.87   |               |
|                         | <i>DR3/DR3</i>         | 21.12      | 3.05   |               |
|                         | <i>DR4-DQ8/DR4-DQ8</i> | 21.98      | 3.09   |               |
|                         | <i>DR4-DQ8/X</i>       | 7.03       | 1.95   |               |
|                         | <i>DR3/X</i>           | 4.53       | 1.51   |               |
| rs1264813               | <i>HLA_A_24</i>        | 1.54       | 0.43   | T             |
| rs2395029               | <i>HLA_B_5701</i>      | 2.5        | 0.92   | T             |
| rs3129889               | <i>HLA_DRB1_15</i>     | 14.88      | 2.70   | A             |
| rs2476601               | <i>PTPN22</i>          | 1.96       | 0.67   | A             |
| rs689                   | <i>INS</i>             | 1.75       | 0.56   | T             |
| rs12722495              | <i>IL2RA</i>           | 1.58       | 0.46   | T             |
| rs2292239               | <i>ERBB3</i>           | 1.35       | 0.30   | T             |
| rs10509540              | <i>C10orf59</i>        | 1.33       | 0.29   | T             |
| rs4948088               | <i>COBL</i>            | 1.3        | 0.26   | C             |
| rs7202877               |                        | 1.28       | 0.25   | G             |
| rs12708716              | <i>CLEC16A</i>         | 1.23       | 0.21   | A             |
| rs3087243               | <i>CTLA4</i>           | 1.22       | 0.20   | G             |
| rs1893217               | <i>PTPN2</i>           | 1.2        | 0.18   | G             |
| rs11594656              | <i>IL2RA</i>           | 1.19       | 0.17   | T             |
| rs3024505               | <i>IL10</i>            | 1.19       | 0.17   | G             |
| rs9388489               | <i>C6orf173</i>        | 1.17       | 0.16   | G             |
| rs1465788               |                        | 1.16       | 0.15   | C             |
| rs1990760               | <i>IFIH1</i>           | 1.16       | 0.15   | T             |
| rs3825932               | <i>CTSH</i>            | 1.16       | 0.15   | C             |
| rs425105                |                        | 1.16       | 0.15   | T             |
| rs763361                | <i>CD226</i>           | 1.16       | 0.15   | T             |
| rs4788084               | <i>IL27</i>            | 1.16       | 0.15   | C             |
| rs17574546              |                        | 1.14       | 0.13   | C             |
| rs11755527              | <i>BACH2</i>           | 1.13       | 0.12   | G             |
| rs3788013               | <i>UBASH3A</i>         | 1.13       | 0.12   | A             |
| rs2069762               | <i>IL2</i>             | 1.12       | 0.11   | A             |
| rs2281808               |                        | 1.11       | 0.10   | C             |
| rs5753037               |                        | 1.1        | 0.10   | T             |

**ESM Table 3. The monogenic diabetes genes analysed in the study.**

| Gene           | Genbank Reference Sequence | Phenotype                                                                                               | Inheritance                           |
|----------------|----------------------------|---------------------------------------------------------------------------------------------------------|---------------------------------------|
| <i>ABCC8</i>   | NM_001287174               | Permanent neonatal diabetes                                                                             | Dominant (often de novo) or recessive |
|                |                            | Transient neonatal diabetes                                                                             | Dominant (often de novo) or recessive |
|                |                            | MODY                                                                                                    | Dominant                              |
| <i>AGPAT2</i>  | NM_006412                  | Congenital generalised lipodystrophy                                                                    | Recessive                             |
| <i>AKT2</i>    | NM_001626                  | Lipodystrophy and severe insulin resistance                                                             | Dominant                              |
| <i>APPL1</i>   | NM_012096                  | MODY                                                                                                    | Dominant                              |
| <i>BSCL2</i>   | NM_032667                  | Congenital generalised lipodystrophy, severe insulin resistance and diabetes                            | Recessive                             |
| <i>CTLA4</i>   | NM_005214                  | Type V autoimmune lymphoproliferative syndrome and autoimmune diabetes                                  | Dominant                              |
| <i>CEL</i>     | NM_001807                  | MODY                                                                                                    | Dominant                              |
| <i>CISD2</i>   | NM_001008388               | Wolfram Syndrome 2 (diabetes mellitus, hearing loss, optic atrophy and defective platelet aggregation). | Recessive                             |
| <i>COQ2</i>    | NM_015697                  | Coenzyme Q10 deficiency, primary, 1 (hyperglycaemia reported)                                           | Recessive                             |
| <i>EIF2AK3</i> | NM_004836                  | Wolcott-Rallison syndrome                                                                               | Recessive                             |
| <i>FOXP3</i>   | NM_014009                  | Immunodysregulation, polyendocrinopathy, and enteropathy, X-linked syndrome (IPEX)                      | X-Linked Recessive                    |
| <i>GATA4</i>   | NM_002052                  | Permanent neonatal diabetes with pancreatic agenesis and congenital heart defects                       | Dominant (often de novo)              |
| <i>GATA6</i>   | NM_005257                  | Permanent neonatal diabetes with pancreatic agenesis and congenital heart defects                       | Dominant (often de novo)              |
| <i>GCK</i>     | NM_000162                  | Permanent neonatal diabetes                                                                             | Recessive                             |
|                |                            | MODY                                                                                                    | Dominant                              |
| <i>GLIS3</i>   | NM_001042413               | Permanent neonatal diabetes with congenital hypothyroidism                                              | Recessive                             |
| <i>HNF1A</i>   | NM_000545                  | MODY                                                                                                    | Dominant                              |
| <i>HNF1B</i>   | NM_000458                  | Renal Cysts and Diabetes syndrome (RCAD)                                                                | Dominant (often de novo)              |
| <i>HNF4A</i>   | NM_175914                  | MODY                                                                                                    | Dominant                              |
| <i>IER3IP1</i> | NM_016097                  | microcephaly, epilepsy, and diabetes syndrome (MEDS)                                                    | Recessive                             |
| <i>IL2RA</i>   | NM_000417                  | Immunodeficiency 41 with lymphoproliferation, autoimmunity and autoimmune diabetes                      | Recessive                             |
| <i>INS</i>     | NM_001185098               | Permanent neonatal diabetes                                                                             | Dominant                              |

|                           |              |                                                                                                                   |                                       |
|---------------------------|--------------|-------------------------------------------------------------------------------------------------------------------|---------------------------------------|
|                           |              |                                                                                                                   | (often de novo) or recessive          |
|                           |              | Transient neonatal diabetes                                                                                       | Dominant (often de novo) or recessive |
|                           |              | MODY                                                                                                              | Dominant                              |
| <i>INSR</i>               | NM_000208    | Severe insulin resistance                                                                                         | Dominant                              |
| <i>ITCH</i>               | NM_001257138 | Multisystem autoimmune disease with facial dysmorphism and autoimmune diabetes                                    | Recessive                             |
| <i>KCNJ11</i>             | NM_000525    | Permanent neonatal diabetes                                                                                       | Dominant (often de novo)              |
|                           |              | Transient neonatal diabetes                                                                                       | Dominant (often de novo)              |
|                           |              | MODY                                                                                                              | Dominant                              |
| <i>LMNA</i>               | NM_170707    | Familial Partial Lipodystrophy (FPLD2) and insulin resistance                                                     | Dominant                              |
| <i>LRBA</i>               | NM_001199282 | Immunodysregulation and autoimmune diabetes                                                                       | Recessive                             |
| <i>MNX1</i>               | NM_005515    | Neonatal diabetes & IUGR                                                                                          | Recessive                             |
| <i>MTTL1</i><br>g.3243A>G | NC_012920    | Maternally inherited diabetes and deafness (MIDD)                                                                 | Mitochondrial                         |
| <i>NEUROD1</i>            | NM_002500    | Permanent neonatal diabetes and neurological abnormalities                                                        | Recessive                             |
|                           |              | MODY                                                                                                              | Dominant                              |
| <i>NEUROG3</i>            | NM_020999    | Permanent neonatal diabetes with congenital malabsorptive diarrhoea                                               | Recessive                             |
| <i>NKX2-2</i>             | NM_002509    | Neonatal diabetes and developmental delay                                                                         | Recessive                             |
| <i>PAX6</i>               | NM_001604    | Aniridia and impaired glucose tolerance                                                                           | Dominant                              |
| <i>PCBD1</i>              | NM_000281    | Hyperphenylalaninemia and diabetes                                                                                | Recessive                             |
| <i>PDX1</i>               | NM_000209    | Permanent neonatal diabetes +/- pancreatic agenesis                                                               | Recessive                             |
|                           |              | MODY                                                                                                              | Dominant                              |
| <i>PLIN1</i>              | NM_002666    | Familial Partial Lipodystrophy (FPLD4) and insulin resistance                                                     | Dominant                              |
| <i>POLD1</i>              | NM_002691    | Mandibular hypoplasia, deafness, progeroid features, and lipodystrophy (MDPL) syndrome                            | Dominant (de novo)                    |
| <i>PPARG</i>              | NM_015869    | Familial Partial Lipodystrophy (FPLD3) and insulin resistance                                                     | Dominant                              |
| <i>PTF1A</i>              | NM_178161    | Permanent neonatal diabetes with cerebellar and pancreatic agenesis                                               | Recessive                             |
| <i>RFX6</i>               | NM_173560    | Permanent neonatal diabetes with pancreatic hypoplasia, intestinal atresia, and gallbladder aplasia or hypoplasia | Recessive                             |
|                           |              | MODY                                                                                                              | Dominant                              |
| <i>SIRT1</i>              | NM_012238    | Monogenic autoimmune diabetes                                                                                     | Dominant                              |
| <i>SLC2A2</i>             | NM_000340    | Fanconi-Bickel syndrome                                                                                           | Recessive                             |

|                |              |                                                                                               |                    |
|----------------|--------------|-----------------------------------------------------------------------------------------------|--------------------|
| <i>SLC19A2</i> | NM_006996    | Thiamine responsive megaloblastic anaemia, diabetes and deafness (TRMA) syndrome              | Recessive          |
| <i>SLC29A3</i> | NM_018344    | H syndrome & PHID syndrome                                                                    | Recessive          |
| <i>STAT1</i>   | NM_007315    | Immunodeficiency 31C and IPEX-like phenotype                                                  | Dominant           |
| <i>STAT3</i>   | NM_139276    | Neonatal diabetes and poly-autoimmune disease                                                 | Dominant/Recessive |
| <i>STAT5B</i>  | NM_012448    | Growth hormone insensitivity with immunodeficiency                                            | Recessive          |
| <i>TRMT10A</i> | NM_001134665 | Juvenile-onset diabetes with microcephaly, epilepsy and intellectual disability               | Recessive          |
| <i>WFS1</i>    | NM_006005    | Wolfram syndrome (Diabetes insipidus, diabetes mellitus, optic atrophy and deafness, DIDMOAD) | Recessive          |
| <i>ZFP57</i>   | NM_001109809 | Transient neonatal diabetes                                                                   | Recessive          |

**ESM Table 4. Genetic etiology and clinical characteristics of monogenic diabetes patients identified in this study**

| study id | Gene    | Variant                      | Protein effect   | ACMG classification   | Genotype      | Sex    | Age at diagnosis (years) | BMI percentile | Duration of diabetes | Parents with diabetes | Consanguineous parents | HbA1c (%/mmol/mol) | T1D-GRS | T1D-GRS centile | GA DA | ICA | IAA | IA-2A | Treatment at recruitment | Additional reported features                                                             |
|----------|---------|------------------------------|------------------|-----------------------|---------------|--------|--------------------------|----------------|----------------------|-----------------------|------------------------|--------------------|---------|-----------------|-------|-----|-----|-------|--------------------------|------------------------------------------------------------------------------------------|
| 11       | GCK     | NM_000162.3:c.1222G>T        | p.Val408Leu      | Likely pathogenic (4) | Heterozygous  | Female | 16.1                     | 33             | 0.0                  | Yes                   | No                     | 6/42               | 0.235   | 6               | Neg   | Neg | Neg |       | None                     |                                                                                          |
| 30       | GCK     | NM_000162.3:c.127C>T         | p.Arg43Cys       | Pathogenic (5)        | Heterozygous  | Male   | 6.8                      | 74             | 2.2                  | No                    | No                     | 5.8/40             | 0.232   | 5               | Neg   | Neg | Neg |       | None                     | Hypothyroidism                                                                           |
| 51       | GCK     | NM_000162.3:c.683C>T         | p.Thr228Met      | Pathogenic (5)        | Heterozygous  | Male   | 4.9                      | 33             | 3.2                  | Yes                   | Yes                    | 6.4/46             | 0.266   | 30              | Neg   |     |     |       | OHA                      |                                                                                          |
| 52       | GCK     | NM_000162.3:c.943C>T         | p.Leu315Phe      | Likely pathogenic (4) | Heterozygous  | Female | 10.6                     | 1              | 0.1                  |                       | No                     | 6.5/48             | 0.235   | 5               | Neg   | Neg | Neg |       | None                     |                                                                                          |
| 54       | INS     | NM_001185098.1:c.188-37T>A   | p.?              | Likely pathogenic (4) | Heterozygous  | Female | 1.6                      | 77             | 3.0                  | No                    | No                     | 7.1/54             | 0.245   | 10              | Neg   |     |     |       | Insulin                  |                                                                                          |
| 55       | PTF1A   | NM_178161.2:c.571C>A         | p.Pro191Thr      | Pathogenic (5)        | Homozygous    | Female | 7.7                      | 87             | 9.4                  | No                    | Yes                    | 11.2/99            | 0.218   | 1               |       |     |     |       | Insulin                  | Coeliac disease, cataracts, skeletal dysplasia, mental retardation                       |
| 75       | SLC19A2 | NM_006996.2:c.237C>A         | p.Tyr79*         | Pathogenic (5)        | Homozygous    | Male   | 3.5                      | 84             | 5.1                  | No                    | No                     | 8/64               | 0.273   | 40              | Neg   | Neg | Neg |       | Insulin                  | Deafness, megaloblastic anemia                                                           |
| 93       | HNF1A   | NM_000545.6:c.872dup         | p.Gly292Argfs*25 | Pathogenic (5)        | Heterozygous  | Female | 10.1                     | 88             | 4.4                  | Yes                   | No                     | 9/75               | 0.235   | 6               | Neg   | Neg |     |       | Insulin                  |                                                                                          |
| 117      | HNF1A   | NM_000545.6:c.723C>A         | p.Cys241*        | Pathogenic (5)        | Heterozygous  | Female | 11.2                     | 17             | 0.1                  | Yes                   | No                     | 7/53               | 0.179   | 0               | Neg   | Neg | Neg |       | None                     |                                                                                          |
| 118      | SLC19A2 | NM_006996.2:c.567_568insT    | p.Leu190Serfs*51 | Pathogenic (5)        | Homozygous    | Female | 3.1                      | 57             | 3.5                  | No                    | No                     | 6.8/51             | 0.263   | 27              | Neg   | Neg |     |       | Insulin                  | Deafness, anemia, congenital heart disease (cardiomyopathy, ASD, TY), diabetes insipidus |
| 131      | MT-RNR2 | NC_012920.1:n.MT-RNR2:*14A>G | m3243            | Pathogenic (5)        | Heteroplasmic | Female | 6.1                      | 41             | 7.6                  | No                    | No                     | 8.4/68             | 0.166   | 0               | Pos   | Neg | Neg |       | Insulin                  |                                                                                          |
| 160      | SLC19A2 | NM_006996.2:c.1265T>C        | p.Leu422Pro      | Likely pathogenic (4) | Homozygous    | Male   | 4.1                      | 60             | 0.1                  | No                    | Yes                    | 6.8/51             | 0.242   | 9               | Neg   | Neg | Neg |       | Insulin                  | Hypermetropia,                                                                           |

|     |       |                            |                  |                       |              |        |      |    |      |     |     |          |       |    |     |     |     |     |         |                                                                                                   |                                                     |
|-----|-------|----------------------------|------------------|-----------------------|--------------|--------|------|----|------|-----|-----|----------|-------|----|-----|-----|-----|-----|---------|---------------------------------------------------------------------------------------------------|-----------------------------------------------------|
|     |       |                            |                  |                       |              |        |      |    |      |     |     |          |       |    |     |     |     |     |         |                                                                                                   | astigmatism, anaemia (transfused, etiology unknown) |
| 202 | HNF1A | NM_000545.6:c.1400C>T      | p.Pro467Leu      | Pathogenic (5)        | Heterozygous | Female | 6.7  | 5  | 0.1  | No  | No  | 13.4/123 | 0.271 | 37 | Neg | Neg | Neg |     | Insulin |                                                                                                   |                                                     |
| 204 | HNF1B | Deletion                   |                  | Pathogenic (5)        | Heterozygous | Male   | 12.9 | 59 | 0.1  | Yes | No  | 14.6/136 | 0.268 | 34 | Neg | Neg | Neg |     | Insulin | Autism                                                                                            |                                                     |
| 216 | INS   | NM_001185098.1:c.287G>C    | p.Cys96Ser       | Pathogenic (5)        | Heterozygous | Male   | 2.0  | 26 | 12.7 | No  | No  | 14/130   | 0.232 | 4  |     |     |     |     | Insulin |                                                                                                   |                                                     |
| 217 | GCK   | NM_000162.3:c.943C>T       | p.Leu315Phe      | Likely pathogenic (4) | Heterozygous | Male   | 5.3  | 11 | 2.8  | No  | No  | 6.2/44   | 0.210 | 1  | Neg | Neg | Neg |     | None    | Bilateral inguinal hernia, bilateral undescended testis, premature birth (maternal pre-eclampsia) |                                                     |
| 239 | WFS1  | NM_006005.3:c.1919_1928del | p.Leu640Profs*15 | Pathogenic (5)        | Homozygous   | Female | 3.9  | 99 | 13.7 | No  | No  | 9.5/80   | 0.227 | 3  | Neg | Neg | Neg |     | Insulin | Blindness and scoliosis (operated for it)                                                         |                                                     |
| 446 | GCK   | NM_000162.3:c.313del       | p.His105Thrfs*11 | Pathogenic (5)        | Heterozygous | Male   | 6.2  | 2  | 1.9  | No  | Yes | 6/42     | 0.218 | 1  |     |     |     |     | None    |                                                                                                   |                                                     |
| 476 | GCK   | NM_000162.3:c.130G>A       | p.Gly44Ser       | Pathogenic (5)        | Heterozygous | Male   | 6.8  | 70 | 8.1  | Yes | No  | 6.9/52   | 0.238 | 7  | Neg | Neg | Neg |     | OHA     |                                                                                                   |                                                     |
| 487 | WFS1  | NM_006005.3:c.529C>A       | p.Arg177Ser      | Likely pathogenic (4) | Homozygous   | Male   | 4.9  | 99 | 4.7  | Yes | No  | 11/97    | 0.181 | 0  | Neg |     | Neg |     | Insulin | Deafness                                                                                          |                                                     |
| 541 | HNF4A | NM_175914.4:c.278G>A       | p.Cys93Tyr       | Pathogenic (5)        | Heterozygous | Female | 13.9 | 98 | 2.6  | No  | No  | 5.8/40   | 0.222 | 2  | Neg | Neg | Neg |     | OHA     |                                                                                                   |                                                     |
| 572 | GCK   | NM_000162.3:c.1174C>G      | p.Arg392Gly      | Pathogenic (5)        | Heterozygous | Male   | 2.4  | 88 | 0.4  | Yes | No  | 6.2/44   | 0.216 | 1  |     | Neg | Neg |     | None    |                                                                                                   |                                                     |
| 597 | HNF1B | NM_000458.3:c.443C>T       | p.Ser148Leu      | Pathogenic (5)        | Heterozygous | Male   | 10.7 | 2  | 1.2  | No  | Yes | 6.9/52   | 0.220 | 2  |     |     |     |     | Insulin |                                                                                                   |                                                     |
| 599 | WFS1  | NM_006005.3:c.1523_1524del | p.Tyr508Cysfs*34 | Pathogenic (5)        | Homozygous   | Female | 7.3  | 23 | 9.2  | No  | Yes | 10.7/93  | 0.223 | 2  | Neg |     |     | Neg | Insulin | optic atrophy, deafness, diabetes insipidus                                                       |                                                     |
| 701 | WFS1  | NM_006005.3:c.1215T>A      | p.Tyr405*        | Pathogenic (5)        | Homozygous   | Female | 6.2  | 24 | 5.6  | No  | Yes | 8.5/69   | 0.207 | 1  | Neg |     |     | Neg | Insulin | Deafness                                                                                          |                                                     |



|      |         |                                                      |                                 |                       |                       |        |      |    |     |     |     |        |       |    |     |     |     |  |         |                                                                            |
|------|---------|------------------------------------------------------|---------------------------------|-----------------------|-----------------------|--------|------|----|-----|-----|-----|--------|-------|----|-----|-----|-----|--|---------|----------------------------------------------------------------------------|
| 750  | SLC29A3 | NM_018344.5:c.607T>C                                 | p.Ser203Pro                     | Likely pathogenic (4) | Homozygous            | Male   | 6.5  | 63 | 4.0 | No  | Yes | 8.8/73 | 0.243 | 10 | Neg |     |     |  | Insulin | Deafness, vitiligo, short stature                                          |
| 752  | KCNJ11  | NM_000525.3:c.481G>A                                 | p.Ala161Thr                     | Likely pathogenic (4) | Heterozygous          | Female | 15.5 | 27 | 0.2 | No  | Yes |        | 0.219 | 2  |     |     |     |  | Insulin | Allergic asthma, immunodeficiency                                          |
| 802  | WFS1    | NM_006005.3:c.776del                                 | p.Ile259Thrfs*28                | Pathogenic (5)        | Homozygous            | Male   | 3.4  | 36 | 3.3 | No  | Yes | 8.8/73 | 0.239 | 7  | Neg | Neg | Neg |  | Insulin |                                                                            |
| 838  | GCK     | NM_000162.3:c.645C>A                                 | p.Tyr215*                       | Pathogenic (5)        | Heterozygous          | Male   | 14.5 | 32 | 4.4 | Yes | No  | 6.1/43 | 0.266 | 30 | Neg | Neg | Neg |  | OHA     |                                                                            |
| 898  | WFS1    | NM_006005.3:c.1885C>T                                | p.Arg629Trp                     | Likely pathogenic (4) | Homozygous            | Male   | 6.0  | 92 | 8.2 | No  | No  | 9.3/78 | 0.208 | 1  | Neg | Neg |     |  | Insulin | constipation                                                               |
| 908  | WFS1    | NM_006005.3:c.1232_1233del and NM_006005.3:c.2511G>A | p.Ser411Cysfs*131 and p.Trp837* | Pathogenic (5)        | Compound Heterozygous | Female | 6.7  | 13 | 3.7 | No  | No  | 8.5/69 | 0.239 | 7  | Neg | Neg | Neg |  | Insulin |                                                                            |
| 1090 | GCK     | NM_000162.3:c.1222G>T                                | p.Val408Leu                     | Likely pathogenic (4) | Homozygous            | Male   | 3.1  | 65 | 9.7 | Yes | Yes | 7.6/60 | 0.235 | 5  | Neg |     |     |  | Insulin |                                                                            |
| 1241 | GCK     | NM_000162.3:c.1256del                                | p.Phe419Serfs*12                | Pathogenic (5)        | Heterozygous          | Female | 14.4 | 66 | 0.6 | Yes | No  | 6.4/46 | 0.238 | 7  | Neg | Neg | Neg |  | None    |                                                                            |
| 1328 | TRMT10A | NM_001134665.2:c.379C>T                              | p.Arg127*                       | Pathogenic (5)        | Homozygous            | Female | 11.4 | 2  | 1.6 | No  | No  | 7.5/58 | 0.243 | 9  | Neg | Neg | Neg |  | None    | Growth hormone deficiency, mental retardation, microcephaly, deep set eyes |



**ESM Table 5: Characteristics of monogenic diabetes identified in our previous systematic study in the UK [1].**

|                                                   | <b>Monogenic Diabetes, n=20</b> | <b>The rest of the cohort n=788</b> | <b>p</b> |
|---------------------------------------------------|---------------------------------|-------------------------------------|----------|
| <b>Age at diagnosis (years)</b>                   | 11 (8.5-14), 20                 | 8 (4-11), 788                       | 0.004    |
| <b>Duration at recruitment (years)</b>            | 2.2 (0.6-3.2), 20               | 4.5 (1.7-8.2), 788                  | 0.002    |
| <b>BMI percentile</b>                             | 89 (57-99), 16                  | 79 (57-94), 776                     | 0.2      |
| <b>Female</b>                                     | 8/20 (40)                       | 362/788 (46)                        | 0.4      |
| <b>White ethnicity</b>                            | 19/20 (95)                      | 773/788 (98)                        | 0.3      |
| <b>Parents with diabetes</b>                      | 18/20 (90)                      | 122/771 (16%)                       | <0.001   |
| <b>Any antibody positive</b>                      | 0/20 (0)                        | 220/298 (74%)                       | <0.001   |
| <b>C-peptide (pmol/l)</b>                         | 2.5 (0.8-5.7), 16               | 0 (0-0.3), 784                      | <0.001   |
| <b>HbA1c at recruitment, %</b>                    | 7.3 (6.5-8.8), 16               | 8.5 (7.7-9.7), 777                  | 0.004    |
| <b>HbA1c at recruitment, mmol/mol</b>             | 56 (48-73), 16                  | 69 (61-83), 777                     |          |
| <b>HbA1c at recruitment <math>\leq</math>7.5%</b> | 8/16 (50)                       | 152/777 (20)                        | 0.007    |
| <b>Current treatment</b>                          |                                 |                                     |          |
| <b>Non-insulin treated</b>                        | 16/20 (80)                      | 9/788 (1)                           | <0.001   |
| <b>Insulin treated</b>                            | 4/20 (20)                       | 779/788 (99)                        |          |
| <b>Insulin dose (units/kg/day)</b>                | 0 (0-0.3), 16                   | 0.9 (0.7-1.1), 776                  | <0.001   |
| <b>T1D-GRS</b>                                    |                                 |                                     |          |
| <b>MODY Prob <math>\geq</math>10%</b>             | 14/16 (88)                      | 49/760 (6)                          | <0.001   |
| <b>Genetic etiologies</b>                         | <i>GCK</i> , 8                  | N/A                                 |          |
|                                                   | <i>HNF1A</i> , 5                |                                     |          |
|                                                   | <i>HNF4A</i> , 4                |                                     |          |
|                                                   | <i>HNF1B</i> , 1                |                                     |          |
|                                                   | <i>ABCC8</i> , 1                |                                     |          |
|                                                   | <i>INSR</i> , 1                 |                                     |          |
| <b>Autosomal dominant</b>                         | 20/20 (100)                     |                                     |          |
| <b>Autosomal recessive</b>                        | 0/20 (0)                        |                                     |          |

Data are median (IQR) for continuous variable or number (%) for categorical variables. Number of people where the data was available is indicated after comma for continuous variables and after forward slash for categorical variables.

**ESM Table 6. Genetic aetiologies of monogenic diabetes identified in routine referrals from the UK in patients with age at diabetes diagnosis between 0.5-20 y.**

| Genetic cause        | Individuals (n) | Mode of inheritance | N individuals with white-European ethnicity | Individuals with other ethnicities                        | Comments               |
|----------------------|-----------------|---------------------|---------------------------------------------|-----------------------------------------------------------|------------------------|
| <i>HNF1A</i>         | 39              | Dominant            | 33                                          | 6 (4 Southasian 1 Black, 1 Hispanic)                      |                        |
| <i>HNF4A</i>         | 19              | Dominant            | 12                                          | 7 (3 Southasian , 1 Black, 1 Hispanic, 1 Arabic, 1 Mixed) |                        |
| <i>GCK</i>           | 12              | Dominant            | 12                                          | 0                                                         |                        |
| <i>HNF1B</i>         | 8               | Dominant            | 6                                           | 2 (1 Black, 1 Hispanic)                                   |                        |
| <i>RFX6</i>          | 8               | Dominant            | 7                                           | 1 (SA)                                                    |                        |
| <i>INSR</i>          | 5               | Dominant            | 4                                           | 1 (Hispanic)                                              |                        |
| <i>GATA6</i>         | 2               | Dominant            | 2                                           | 0                                                         |                        |
| <i>m.3243A &gt;G</i> | 2               | Mitochondria        | 2                                           | 0                                                         |                        |
| <i>ABCC8</i>         | 2               | Dominant            | 2                                           | 0                                                         |                        |
| <i>ABCC8</i>         | 1               | Recessive           | 0                                           | 1 (Arabic)                                                | Consanguineous parents |
| <i>NEURO D1</i>      | 1               | Dominant            | 0                                           | 1 (SA)                                                    |                        |
| <i>PPARG</i>         | 1               | Dominant            | 0                                           | 1 (Black)                                                 |                        |
| <i>INS</i>           | 1               | Dominant            | 1                                           | 0                                                         |                        |
| <i>STAT3</i>         | 1               | Recessive           | 0                                           | 1 (Arabic)                                                | Consanguineous parents |

**ESM Table 7: Clinical characteristics of autosomal dominant and autosomal recessive monogenic diabetes, and the rest of the cohort.**

|                                                                  | Monogenic diabetes autosomal dominant causes, n=19 | Monogenic diabetes autosomal recessive causes, n=14 | Rest of the cohort, n=1059 | p Autosomal dominant cases vs the rest of cohort | p Autosomal recessive cases vs the rest of cohort | p Autosomal dominant vs autosomal recessive |
|------------------------------------------------------------------|----------------------------------------------------|-----------------------------------------------------|----------------------------|--------------------------------------------------|---------------------------------------------------|---------------------------------------------|
| <b>Age at diagnosis (years)</b>                                  | 10.1 (5.3-13.9), 19                                | 5.4 (3.5-6.7), 14                                   | 8.2 (5.1-11.5), 1059       | 0.47                                             | 0.008                                             | 0.04                                        |
| <b>Female</b>                                                    | 9/19 (47)                                          | 7/14 (50)                                           | 530/1059 (50)              | 1.0                                              | 1.0                                               | 1                                           |
| <b>Age at recruitment (years)</b>                                | 11.9 (8.1-14.9), 19                                | 11.1 (8.6-14.1), 14                                 | 12.5 (9.1-15.4), 1059      | 0.61                                             | 0.44                                              | 0.80                                        |
| <b>BMI percentile</b>                                            | 33 (11-74), 19                                     | 61 (24-87), 14                                      | 61 (34-82), 1058           | 0.04                                             | 0.90                                              | 0.25                                        |
| <b>Current treatment</b>                                         |                                                    |                                                     |                            |                                                  |                                                   |                                             |
| <b>Non-Insulin</b>                                               | 12/19 (63)                                         | 1/14 (7)                                            | 17/1059 (2)                | <0.001                                           | 0.21                                              | 0.001                                       |
| <b>Insulin</b>                                                   | 7/19 (37)                                          | 13/14 (93)                                          | 1042/1059 (98)             |                                                  |                                                   |                                             |
| <b>Insulin dose (units/kg/day)</b>                               | 0.6 (0.4-0.7), 7                                   | 0.9 (0.8-1.2), 12                                   | 0.9 (0.7-1.1), 976         | 0.012                                            | 0.30                                              | 0.02                                        |
| <b>Non-Autoimmune, extra-pancreatic features</b>                 | 2/19 (11)                                          | 11/14 (79)                                          | 55/1043 (5)                | 0.27                                             | <0.001                                            | <0.001                                      |
| <b>Parents with diabetes</b>                                     | 9/18 (50)                                          | 2/14 (14)                                           | 145/1043 (14)              | <0.001                                           | 1.0                                               | 0.06                                        |
| <b>Consanguineous parents</b>                                    | 4/19 (21)                                          | 7/14 (50)                                           | 212/1059 (20)              | 1                                                | 0.01                                              | 0.14                                        |
| <b>HbA1c at recruitment, %</b>                                   | 6.5 (6.1-7.1), 18                                  | 8.7 (7.6-9.5), 14                                   | 8.7 (7.5-10.3), 1043       | <0.001                                           | 0.79                                              | 0.01                                        |
| <b>HbA1c at recruitment, mmol/mol</b>                            | 48 (43-54), 18                                     | 72 (60-80), 14                                      | 72 (58-89), 1043           |                                                  |                                                   |                                             |
| <b>HbA1c ≤7.5% at recruitment</b>                                | 14/18, (78)                                        | 3/14, (21)                                          | 264/1059 (25)              | <0.001                                           | 1.00                                              | 0.005                                       |
| <b>Islet autoantibody positive</b>                               | 1/15 (0)                                           | 0/13 (0)                                            | 478/701 (68)               | <0.001                                           | <0.001                                            | N/A                                         |
| <b>Diabetes duration at time of antibody measurement, months</b> | 0 (0-0), 14                                        | 41 (0-76), 11                                       | 0 (0-0), 656               | 0.66                                             | <0.001                                            | 0.008                                       |
| <b>C-peptide (pmol/l) within 6 months of diagnosis</b>           | 463 (226-804), 12                                  | 151 (77-430), 5                                     | 153 (83-278), 585          | <0.001                                           | 0.92                                              | 0.09                                        |
| <b>T1D-genetic risk score</b>                                    | 0.235 (0.219-0.245), 19                            | 0.237 (0.218-0.243), 14                             | 0.279 (0.258-0.298), 1059  | <0.001                                           | <0.001                                            | 0.97                                        |
| <b>Composite clinical probability of MODY ≥10%</b>               | 9/12 (75)                                          | 2/13 (15)                                           | 65/890 (7)                 | <0.001                                           | 0.25                                              | 0.005                                       |

Data are median (IQR) for continuous variable or number (%) for categorical variables. Number of people where the data was available is indicated after comma for continuous variables and after forward slash for categorical variables. MODY, Maturity Onset Diabetes of the Young.

**ESM Table 8. Performance of patient selection criteria for identifying monogenic diabetes.** Odds ratio for each criteria is calculated against the rest of cohort (n=1059).

| <b>Paediatric diabetes clinic cohort from Turkey - a population with high rates of consanguinity</b> |                                       |          |                                        |          |
|------------------------------------------------------------------------------------------------------|---------------------------------------|----------|----------------------------------------|----------|
| <b>Patient selection criteria</b>                                                                    | <b>Autosomal dominant cases, n=19</b> |          | <b>Autosomal recessive cases, n=14</b> |          |
|                                                                                                      | <b>Odds ratio (95% CI)</b>            | <b>p</b> | <b>Odds ratio (95% CI)</b>             | <b>p</b> |
| Parents with diabetes                                                                                | 6.2 (2.1-17.9)                        | 0.0003   | 1 (0.1-4.7)                            | 1        |
| Non-insulin treatment                                                                                | 105.1 (32.6-347.9)                    | <0.0001  | 4.7 (0.1-34.9)                         | 0.2      |
| HbA1c ≤7.5% (58 mmol/mol)                                                                            | 10.3 (3.2-43.4)                       | <0.0001  | 0.8 (0.1-3.1)                          | 1        |
| Composite clinical probability of MODY ≥10%                                                          | 38 (9.1-221.2)                        | <0.0001  | 2.3 (0.2-10.9)                         | 0.3      |
| Non-autoimmune extra pancreatic features                                                             | 2.1 (0.2-9.4)                         | 0.3      | 66.9 (16.8-379.1)                      | <0.0001  |
| Consanguineous parents                                                                               | 1.1 (0.3-3.4)                         | 1        | 4 (1.2-13.5)                           | 0.012    |
| <b>Paediatric diabetes clinic cohort from the UK(2), predominantly nonconsanguineous population</b>  |                                       |          |                                        |          |
|                                                                                                      | <b>Autosomal dominant cases, n=20</b> |          | <b>Autosomal recessive cases, n=0</b>  |          |
|                                                                                                      | <b>Odds ratio (95% CI)</b>            | <b>p</b> |                                        |          |
| Parents with diabetes                                                                                | 47.9 (11.2-427.7)                     | <0.0001  | -                                      | -        |
| Non-insulin treatment                                                                                | 346.1 (85-1680.8)                     | <0.0001  | -                                      | -        |
| HbA1c ≤7.5% (58 mmol/mol)                                                                            | 4.1 (1.3-12.8)                        | 0.0068   | -                                      | -        |
| Composite clinical probability of MODY ≥10%                                                          | 101.6 (22-929.9)                      | <0.0001  | -                                      | -        |

**ESM Table 9: The list of extra-pancreatic non-autoimmune features that were reported by the clinicians at recruitment in patients with monogenic diabetes.**

|                              |
|------------------------------|
| Cataracts                    |
| Anaemia                      |
| Autism                       |
| Bilateral inguinal hernia    |
| Bilateral undescended testis |
| Blindness                    |
| Congenital heart disease     |
| Deafness                     |
| Diabetes insipidus           |
| Growth hormone deficiency    |
| Hypermetropia                |
| Developmental Delay          |
| Microcephaly                 |
| Optic atrophy                |
| Scoliosis                    |
| Short stature                |
| Skeletal dysplasia           |
| Constipation                 |

**ESM Table 10. Systematic review of Genetic Testing Registry for the monogenic diabetes gene panels.** We undertook systematic search in Gene testing registry (<https://www.ncbi.nlm.nih.gov/gtr/>) on 12<sup>th</sup> June 2020 We used the following search criteria - Diabetes mellitus[DISNAME] AND (testtype\_clinical[PROP]) AND ("Next-Generation (NGS)/Massively parallel sequencing (MPS)"[METHOD]) AND (testpurpose\_diagnosis[PROP]), C0342276[DISCU] OR C0342277[DISCU], C3888631[DISCU] to identify laboratories that offered gene panel tests for monogenic diabetes. We identified 26 laboratories that offered 34 gene panel tests for monogenic diabetes. MODY, Maturity onset diabetes of the young; NDM, Neonatal diabetes

| Name of the genetic lab                                                                   | Country              | Type of panel offered                        | No. of genes on the panel | No. of recessive monogenic diabetes genes on the panel | Maximum no. of recessive genes in non-NDM panel | WFS1 in Non-NDM panel | SLC19A2 in Non-NDM panel |
|-------------------------------------------------------------------------------------------|----------------------|----------------------------------------------|---------------------------|--------------------------------------------------------|-------------------------------------------------|-----------------------|--------------------------|
| Al Jalila Children's Genomics Center Al Jalila Childrens Speciality Hospital              | United Arab Emirates | MODY                                         | 17                        | 6                                                      | 6                                               | No                    | No                       |
| Ambry Genetics                                                                            | United States        | MODY                                         | 5                         | 2                                                      | 2                                               | No                    | No                       |
| Arkansas Children's Hospital<br>Arkansas Childrens Hospital                               | United States        | MODY                                         | 11                        | 5                                                      | 5                                               | No                    | No                       |
| Asper Biogene                                                                             | Estonia              | MODY                                         | 15                        | 7                                                      | 7                                               | No                    | No                       |
| Blueprint Genetics                                                                        | Finland              | MODY,<br>Comprehensive<br>Monogenic Diabetes | 13, 28                    | 6, 13                                                  | 6                                               | Yes                   | No                       |
| CEN4GEN Institute for Genomics and Molecular Diagnostics                                  | Canada               | NDM                                          | 5                         | 4                                                      | -                                               | -                     | -                        |
| Centogene AG - the Rare Disease Company                                                   | Germany              | MODY, NDM                                    | 15, 10                    | 8, 6                                                   | 8                                               | No                    | No                       |
| CGC Genetics                                                                              | Portugal             | Hyperglycemia and diabetes, NDM              | 74, 13                    | 25, 9                                                  | 25                                              | Yes                   | Yes                      |
| DDC Clinic Molecular Diagnostics Laboratory DDC Clinic, Center for Special Needs Children | United States        | MODY, Monogenic diabetes                     | 13, 26                    | 5, 10                                                  | 10                                              | Yes                   | No                       |
| EGL Genetic Diagnostics Eurofins Clinical Diagnostics                                     | United States        | MODY                                         | 4                         | 2                                                      | 2                                               | No                    | No                       |
| Esoterix LabCorp                                                                          | United States        | MODY                                         | 4                         | 1                                                      | 1                                               | No                    | No                       |
| Fulgent Genetics                                                                          | United States        | MODY & Neonatal Diabetes                     | 30                        | 15                                                     | 15                                              | Yes                   | No                       |
| GeneDx                                                                                    | United States        | MODY                                         | 16                        | 5                                                      | 5                                               | No                    | No                       |



|                                                                                                 |               |                          |           |          |    |     |    |
|-------------------------------------------------------------------------------------------------|---------------|--------------------------|-----------|----------|----|-----|----|
| GENETAQ Molecular Genetics Centre and Diagnosis of Rare Diseases                                | Spain         | MODY, NDM                | 11, 17    | 3, 12    | 3  | No  | No |
| Genetic Diagnostic Laboratory University of Pennsylvania School of Medicine                     | United States | MODY                     | 15        | 5        | 5  | No  | No |
| Genetic Services Laboratory University of Chicago                                               | United States | MODY, MODY& NDM, NDM     | 14, 45,15 | 5, 22, 9 | 22 | Yes | No |
| Greenwood Genetic Center Diagnostic Laboratories Greenwood Genetic Center                       | United States | MODY                     | 14        | 5        | 5  | No  | No |
| Instituto de Medicina Genomica                                                                  | Spain         | MODY                     | 4         | 1        | 1  | No  | No |
| Knight Diagnostic Laboratories - Molecular Diagnostic Center Oregon Health & Science University | United States | MODY                     | 25        | 14       | 14 | No  | No |
| Laboratorio de Genetica Clinica SL                                                              | Spain         | MODY & Diabetes Neonatal | 25        | 14       | 14 | No  | No |
| Laboratory for Molecular Diagnostics Center for Nephrology and Metabolic Disorders              | Germany       | MODY                     | 11        | 4        | 4  | No  | No |
| LifeLabs Genetics                                                                               | Canada        | MODY, Monogenic Diabetes | 16, 43    | 8, 13    | 13 | Yes | No |
| Molecular Genetics Laboratory - Diagnostics Genetics LabPLUS - Auckland City Hospital           | New Zealand   | MODY                     | 4         | 1        | 1  | No  | No |
| PreventionGenetics                                                                              | United States | MODY                     | 14        | 6        | 6  | No  | No |
| Reference Laboratory Genetics                                                                   | Spain         | MODY, NDM                | 11, 16    | 4, 12    | 4  | No  | No |
| Synlab MVZ Humane Genetik München                                                               | Germany       | MODY                     | 7         | 3        | 3  | No  | No |

**ESM Fig. 1: Flow chart showing study recruitment and genetic testing pathway.** Genetic etiologies and the number of affected individuals is indicated. T1D-GRS, Type 1 diabetes Genetic Risk score. All cases (n=111) with low T1D-GRS (<0.234, <5<sup>th</sup> centile of T1D population) and 125 individuals with negative islet autoantibodies and low to moderate T1D-GRS (0.234-0.280) (5<sup>th</sup>-50<sup>th</sup> centile of T1D population) were selected for genetic testing

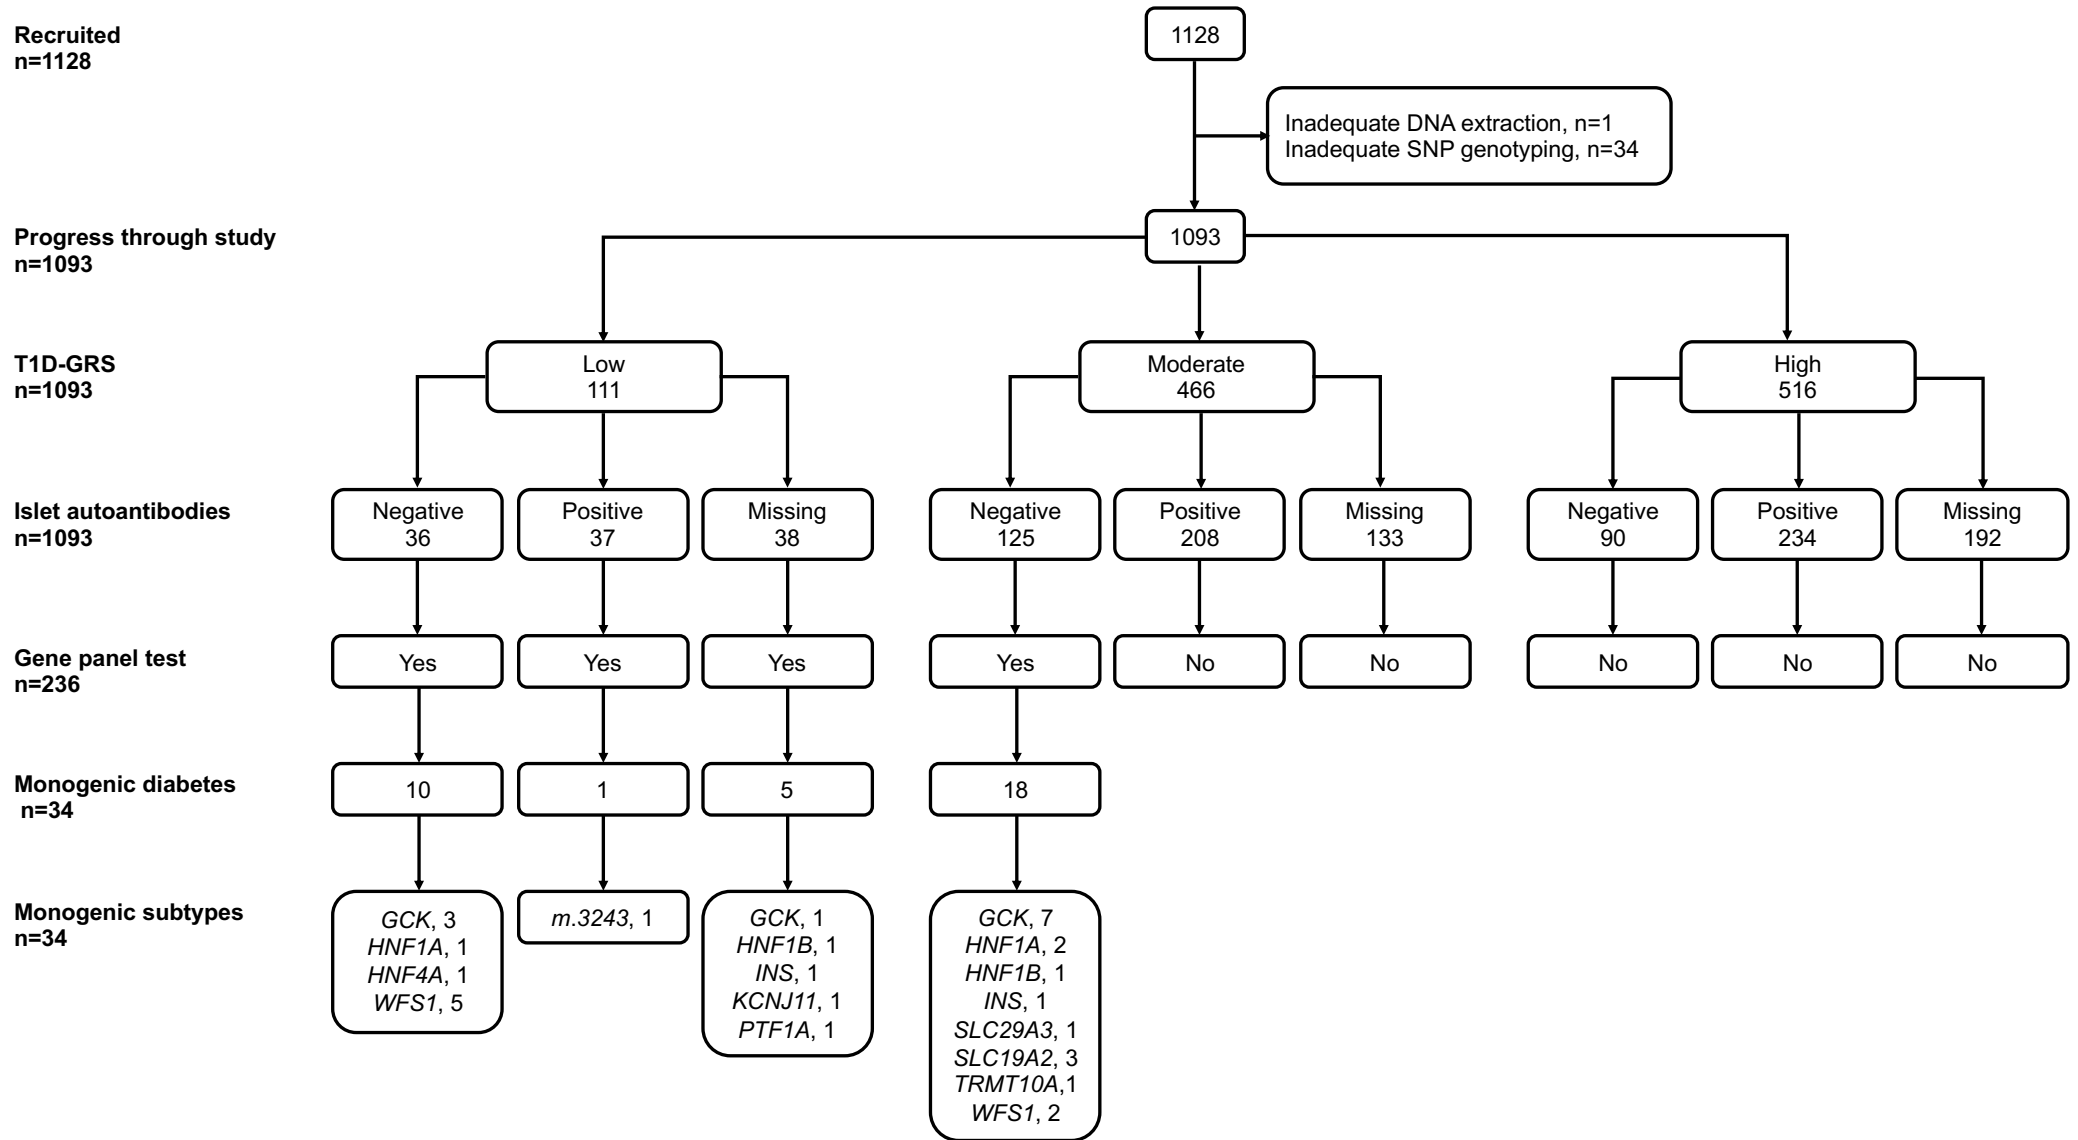

**ESM Fig. 2. T1D-GRS of children with T1D from European and Turkish ancestry.** The graph showing T1D-GRS for the 1963 European T1D children from the WTCCC study and the 472 Turkish children with definite T1D (clinically diagnosed with t1D, insulin treated from diagnosis and positive for islet autoantibodies). the Mann-Whitney U test  $P=0.48$ , two-sample Kolmogorov-Smirnov test  $P=0.37$

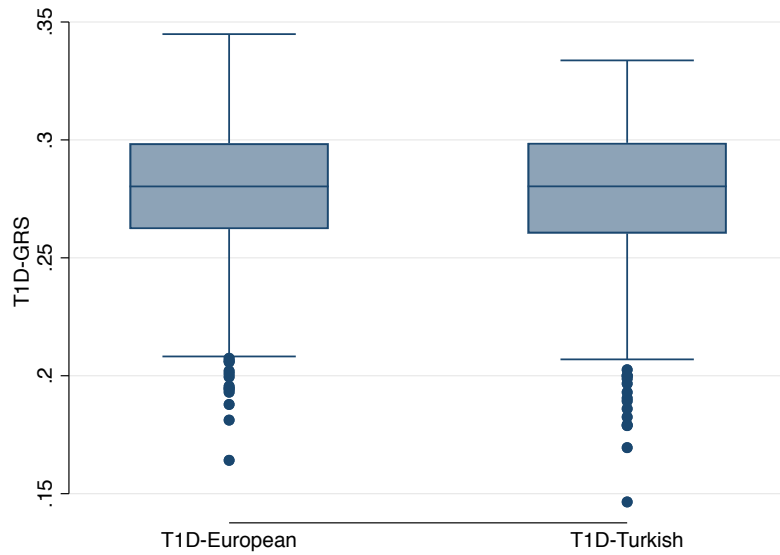

## ESM Reference

- [1] Shepherd M, Shields B, Hammersley S, et al. (2016) Systematic Population Screening, Using Biomarkers and Genetic Testing, Identifies 2.5% of the U.K. Pediatric Diabetes Population With Monogenic Diabetes. *Diabetes Care* 39(11): 1879-1888. 10.2337/dc16-0645
- [2] Patel KA, Oram RA, Flanagan SE, et al. (2016) Type 1 Diabetes Genetic Risk Score: A Novel Tool to Discriminate Monogenic and Type 1 Diabetes. *Diabetes* 65(7): 2094-2099. 10.2337/db15-1690
- [3] Ellard S, Lango Allen H, De Franco E, et al. (2013) Improved genetic testing for monogenic diabetes using targeted next-generation sequencing. *Diabetologia* 56(9): 1958-1963. 10.1007/s00125-013-2962-5
- [4] Richards S, Aziz N, Bale S, et al. (2015) Standards and guidelines for the interpretation of sequence variants: a joint consensus recommendation of the American College of Medical Genetics and Genomics and the Association for Molecular Pathology. *Genet Med* 17(5): 405-424. 10.1038/gim.2015.30
